# Supplementary material
Source: PubMed Central journal article supplement (PMC4077270)

# Smoking Cessation e-Referrals

## A National Dental Practice-Based Research Network Randomized Controlled Trial

Midge N. Ray, RN, MSN, Ellen Funkhouser, DrPH, Jessica H. Williams, PhD, MPH,  
Rajani S. Sadasivam, PhD, Gregg H. Gilbert, DDS, MBA, Heather L. Coley, MPH,  
D. Brad Rindal, DDS, Thomas K. Houston, MD, MPH

### Appendix A

Study timeline for data collection and communications with dental practices and smokers

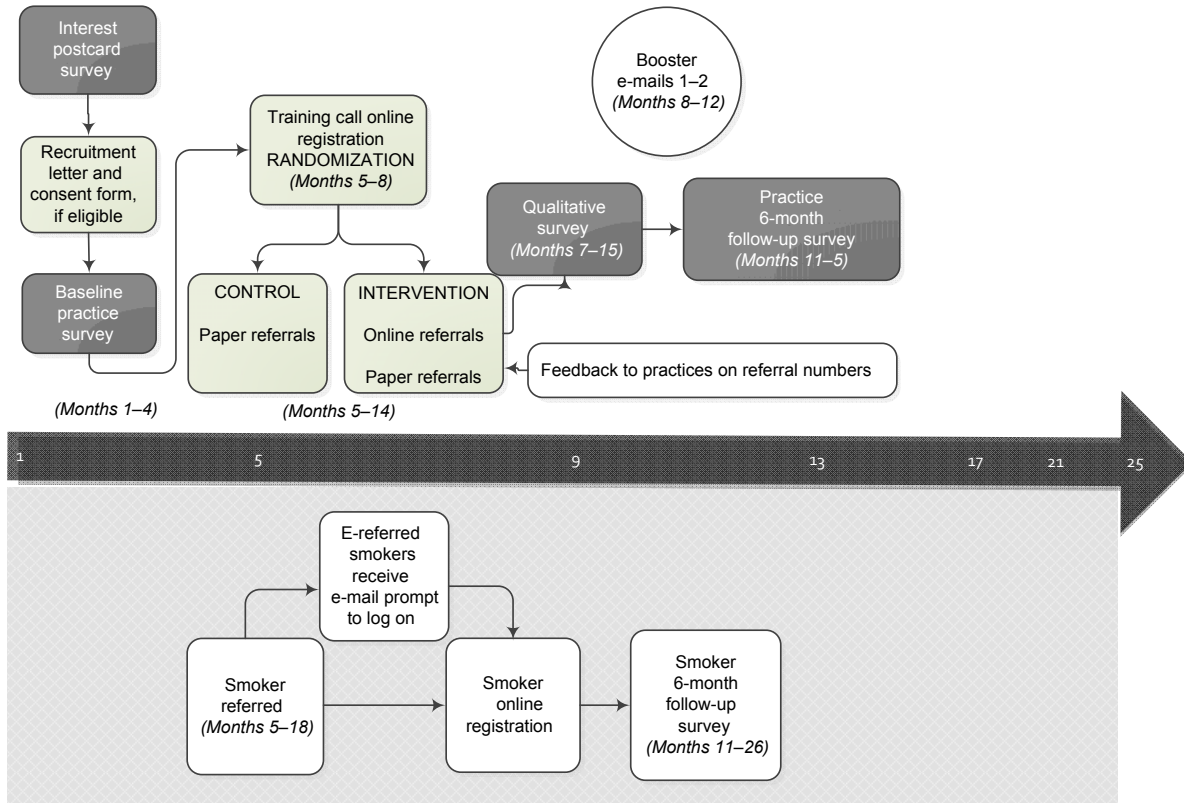

Supplement: NIHMS568876-supplement-01.pdf [file NIHMS568876-supplement-01.pdf]
